# Supplementary material
Source: PubMed Central journal article supplement (PMC9561434)
Supplement: mmc1.pdf [file mmc1.pdf]

# #43601 Paid Unfulfilled

September 23, 2022 at 10:25 pm from Online Store

## Unfulfilled (30) ...

|                                                                                                                                                                          |                                   |                   |          |
|--------------------------------------------------------------------------------------------------------------------------------------------------------------------------|-----------------------------------|-------------------|----------|
|  <span style="border: 1px solid black; border-radius: 50%; padding: 2px 5px;">30</span> | Combined Proofreading and Editing | <del>\$5.99</del> | \$116.70 |
|                                                                                                                                                                          | 7 Days                            | \$3.89 × 30       |          |

- SAVE35P-YRC discount applied

Shipping not required.

|                  |             |                 |
|------------------|-------------|-----------------|
| <b>Paid</b>      |             |                 |
| Discount         | SAVE35P-YRC | Applied         |
| Subtotal         | 30 items    | \$116.81        |
| <b>Total</b>     |             | <b>\$116.81</b> |
| Paid by customer |             | \$116.81        |

## Timeline

|   |                                                                         |          |
|---|-------------------------------------------------------------------------|----------|
| ● | <b>SEPTEMBER 25</b>                                                     |          |
| ○ | \$112.30 USD was added to your <a href="#">Sep 27, 2022</a> payout.     | 9:42 PM  |
| ● | <b>SEPTEMBER 23</b>                                                     |          |
| ○ | Order confirmation email was sent to Giang Vuong (giangvth@buh.edu.vn). | 10:26 PM |
| ○ | A \$116.81 USD payment was processed using a Visa ending in 3619.       | 10:26 PM |
| ○ | \$112.30 USD will be added to your Sep 27, 2022 payout.                 | 10:26 PM |
| ○ | Confirmation #YYQWL2ULC was generated for this order.                   | 10:26 PM |
| ○ | Giang Vuong placed this order on Online Store.                          | 10:26 PM |

## Notes Edit

INVOICE

## ADDITIONAL DETAILS Edit

minimum\_turnaround\_phrase  
9:03AM (your local time) on October 1, 2022

## Customer ×

[Giang Vuong](#)  
[3 orders](#)

## CONTACT INFORMATION Edit

giangvth@buh.edu.vn

## SHIPPING ADDRESS Edit

No shipping address provided

## BILLING ADDRESS

Thi Huong Giang Vuong  
No 36 Ton That Dam, District1  
Ho Chi Minh 70000  
Vietnam  
0388654306

Note saved ×
